# Supplementary material
Source: publisher figshare collection journal article supplement (https://acs.figshare.com/ndownloader/files/5681652)
Supplement: Supplementary file 1 [file 5681652]

# cm0211148.cif

#1. submission details 
 
_publ_contact_author           # name and address of author for correspondence 
; 
      Dr. C. Serre
      Institut Lavoisier, IREM, UMR CNRS C 8637
      Universit\'e de Versailles Saint-Quentin-en-Yvelines
      45 Avenue des Etats Unis
      78035 Versailles cedex
      France
; 
_publ_contact_author_phone        '(33) 1 39 25 43 05' 
_publ_contact_author_fax          '(33) 1 39 25 43 58' 
_publ_contact_author_email        serre@chimie.uvsq.fr 
 
_publ_requested_journal           'Chemistry of Materials' 
_publ_requested_coeditor_name     ? 
 
_publ_contact_letter 
; 
; 
 
#============================================================================== 
 
# 2. processing summary (iucr office use only) 
 
_journal_date_recd_electronic     ? 
 
_journal_date_to_coeditor         ? 
_journal_date_from_coeditor       ? 
_journal_date_accepted            ? 
 
_journal_date_printers_first      ? 
_journal_date_printers_final      ? 
_journal_date_proofs_out          ? 
_journal_date_proofs_in           ? 
 
_journal_coeditor_name            ? 
_journal_coeditor_code            ? 
_journal_coeditor_notes 
; 
; 
 
_journal_techeditor_code          ? 
_journal_techeditor_notes 
; 
; 
 
_journal_coden_astm               ? 
_journal_name_full                ? 
_journal_year                     ? 
_journal_volume                   ? 
_journal_issue                    ? 
_journal_page_first               ? 
_journal_page_last                ? 
 
_journal_suppl_publ_number        ? 
_journal_suppl_publ_pages         ? 
 
#============================================================================== 
 
# 3. title and author list 
 
_publ_section_title 
; 
Hydrothermal Synthesis, Structure Determination, 
Thermal Behavior of New Three-dimensional Europium Terephtalates :
MIL-51LT, HT and MIL-52 or Eu2n(OH)x(H2O)y(O2C-C6H4-CO2)z
(n=III, III, II; x=4, 0, 0; y=2, 0, 0; z=1, 1, 2)
; 
 
# the loop structure below should contain the names and addresses of all 
# authors, in the required order of publication. repeat as necessary. 
 
loop_ 
        _publ_author_name 
        _publ_author_address 
     'Serre,Christian' 
;     Institut Lavoisier, IREM, UMR CNRS C 8637
      Universit\'e de Versailles Saint-Quentin-en-Yvelines
      45 Avenue des Etats Unis
      78035 Versailles cedex
      France
; 
     'Millange, Franck' 
;     Institut Lavoisier, IREM, UMR CNRS C 8637
      Universit\'e de Versailles Saint-Quentin-en-Yvelines
      45 Avenue des Etats Unis
      78035 Versailles cedex
      France
; 
     'Marrot, Jerome' 
;     Institut Lavoisier, IREM, UMR CNRS C 8637
      Universit\'e de Versailles Saint-Quentin-en-Yvelines
      45 Avenue des Etats Unis
      78035 Versailles cedex
      France
; 
     'Ferey, Gerard' 
;     Institut Lavoisier, IREM, UMR CNRS C 8637
      Universit\'e de Versailles Saint-Quentin-en-Yvelines
      45 Avenue des Etats Unis
      78035 Versailles cedex
      France
;  
#============================================================================== 

# 4. text 
 
_publ_section_abstract 
; 
 
; 
_publ_section_comment 
; 
 
; 
_publ_section_experimental 
; 
 
; 
_publ_section_references 
; 
sheldrick, g.m. (1993).  shelxl-93. program for crystal structure 
determination.  univ. of g\"ottingen, federal republic of germany. 
 
sheldrick, g.m. (1997).  shelxs-86. program for the solution of crystal 
structures.  univ. of g\"ottingen, federal republic of germany. 
; 
_publ_section_figure_captions 
; 
 
; 
_publ_section_acknowledgements 
; 
 
; 
#====================================================================    
data_mil51ht
 
_audit_creation_method            SHELXL-97 
_chemical_name_systematic 
; 
 ? 
; 
_chemical_name_common             ? 
_chemical_melting_point           ? 
_chemical_formula_moiety          ? 
_chemical_formula_sum 
 'C8 H8 Eu2 O8' 
_chemical_formula_weight          536.06 
 
loop_ 
 _atom_type_symbol 
 _atom_type_description 
 _atom_type_scat_dispersion_real 
 _atom_type_scat_dispersion_imag 
 _atom_type_scat_source 
 'C'  'C'   0.0033   0.0016 
 'International Tables Vol C Tables 4.2.6.8 and 6.1.1.4' 
 'O'  'O'   0.0106   0.0060 
 'International Tables Vol C Tables 4.2.6.8 and 6.1.1.4' 
 'Eu'  'Eu'  -0.1578   3.6682 
 'International Tables Vol C Tables 4.2.6.8 and 6.1.1.4' 
 'H'  'H'   0.0000   0.0000 
 'International Tables Vol C Tables 4.2.6.8 and 6.1.1.4' 
 
_symmetry_cell_setting            triclinic 
_symmetry_space_group_name_H-M    P-1
 
loop_ 
 _symmetry_equiv_pos_as_xyz 
 'x, y, z' 
 '-x, -y, -z' 
 
_cell_length_a                    3.6773(7) 
_cell_length_b                    6.2569(13) 
_cell_length_c                    11.969(2) 
_cell_angle_alpha                 91.01(3) 
_cell_angle_beta                  97.53(3) 
_cell_angle_gamma                 91.03(3) 
_cell_volume                      272.91(9) 
_cell_formula_units_Z             1 
_cell_measurement_temperature     293(2) 
_cell_measurement_reflns_used     25 
_cell_measurement_theta_min       18 
_cell_measurement_theta_max       22 
 
_exptl_crystal_description        platelet 
_exptl_crystal_colour             colorless
_exptl_crystal_size_max           0.10 
_exptl_crystal_size_mid           0.08 
_exptl_crystal_size_min           0.02 
_exptl_crystal_density_meas       ? 
_exptl_crystal_density_diffrn     3.262 
_exptl_crystal_density_method     'not measured' 
_exptl_crystal_F_000              246 
_exptl_absorpt_coefficient_mu     11.416 
_exptl_absorpt_correction_type    Gaussian 
_exptl_absorpt_correction_T_min   0.3948 
_exptl_absorpt_correction_T_max   0.8038 
_exptl_absorpt_process_details    '(Xtal3.2 ABSORB; Hall et al., 1992)'
 
_exptl_special_details 
; 
 Scan mode        \W - \Q
 Scan width      (1.4+0.35*tan\q)\%
 Slit aperture   (1.2+tan\q)mm
; 
 
_diffrn_ambient_temperature       293(2) 
_diffrn_radiation_wavelength      0.71073 
_diffrn_radiation_type            MoK\a 
_diffrn_radiation_source          'fine-focus sealed tube' 
_diffrn_radiation_monochromator   graphite 
_diffrn_measurement_device_type   'Enraf-Nonius CAD-4' 
_diffrn_measurement_method        bisecting 
_diffrn_detector_area_resol_mean  ? 
_diffrn_standards_number          3 
loop_
_diffrn_standard_refln_index_h
_diffrn_standard_refln_index_k
_diffrn_standard_refln_index_l
   -3    3    1
    3    0    3
    0    5    4
_diffrn_standards_interval_count  86
_diffrn_standards_interval_time   60 
_diffrn_standards_decay_%         2 
_diffrn_standards_decay_corr_max 1.051
_diffrn_standards_decay_corr_min 0.946
_diffrn_reflns_number             4056 
_diffrn_reflns_av_R_equivalents   0.0577 
_diffrn_reflns_av_sigmaI/netI     0.1300 
_diffrn_reflns_limit_h_min        -7 
_diffrn_reflns_limit_h_max        7 
_diffrn_reflns_limit_k_min        -12 
_diffrn_reflns_limit_k_max        12 
_diffrn_reflns_limit_l_min        0 
_diffrn_reflns_limit_l_max        23 
_diffrn_reflns_theta_min          3.26 
_diffrn_reflns_theta_max          44.99 
_reflns_number_total              3925 
_reflns_number_gt                 2572 
_reflns_threshold_expression      >2sigma(I) 

_computing_data_collection        'CAD-4 Software (Enraf-Nonius, 1989)' 
_computing_cell_refinement        'CAD-4 Software' 
_computing_data_reduction         'Xtal3.2 (Hall et al., 1992)' 
_computing_structure_solution     'SHELXS-97 (Sheldrick, 1990)' 
_computing_structure_refinement   'SHELXL-97 (Sheldrick, 1997)' 
_computing_molecular_graphics     'Diamond Brandenburg'  
_computing_publication_material   'Bruker SHELXTL'  
 
_refine_special_details 
; 
 Refinement of F^2^ against ALL reflections.  The weighted R-factor wR and 
 goodness of fit S are based on F^2^, conventional R-factors R are based 
 on F, with F set to zero for negative F^2^. The threshold expression of 
 F^2^ > 2sigma(F^2^) is used only for calculating R-factors(gt) etc. and is 
 not relevant to the choice of reflections for refinement.  R-factors based 
 on F^2^ are statistically about twice as large as those based on F, and R- 
 factors based on ALL data will be even larger. 
; 
 
_refine_ls_structure_factor_coef  Fsqd  
_refine_ls_matrix_type            full 
_refine_ls_weighting_scheme       calc  
_refine_ls_weighting_details 
 'calc w=1/[\s^2^(Fo^2^)+(0.0602P)^2^+0.0000P] where P=(Fo^2^+2Fc^2^)/3' 
_atom_sites_solution_primary      direct 
_atom_sites_solution_secondary    difmap 
_atom_sites_solution_hydrogens    geom 
_refine_ls_hydrogen_treatment     mixed 
_refine_ls_extinction_method      SHELXL 
_refine_ls_extinction_coef        0.0036(19) 
_refine_ls_extinction_expression 
 'Fc^*^=kFc[1+0.001xFc^2^\l^3^/sin(2\q)]^-1/4^' 
_refine_ls_number_reflns          3925 
_refine_ls_number_parameters      83 
_refine_ls_number_restraints      0 
_refine_ls_R_factor_all           0.1124 
_refine_ls_R_factor_gt            0.0461 
_refine_ls_wR_factor_ref          0.1183 
_refine_ls_wR_factor_gt           0.0990 
_refine_ls_goodness_of_fit_ref    1.005 
_refine_ls_restrained_S_all       1.005 
_refine_ls_shift/su_max           0.001 
_refine_ls_shift/su_mean          0.000 
 
loop_ 
 _atom_site_label 
 _atom_site_type_symbol 
 _atom_site_fract_x 
 _atom_site_fract_y 
 _atom_site_fract_z 
 _atom_site_U_iso_or_equiv 
 _atom_site_adp_type 
 _atom_site_occupancy 
 _atom_site_symmetry_multiplicity 
 _atom_site_calc_flag 
 _atom_site_refinement_flags 
 _atom_site_disorder_assembly 
 _atom_site_disorder_group 
Eu Eu -0.22199(7) 0.75450(5) 0.06575(3) 0.00758(7) Uani 1 1 d . . . 
O1 O -0.2280(10) 1.1351(7) 0.0490(4) 0.0095(6) Uani 1 1 d . . . 
O2 O -0.2987(11) 0.5019(7) -0.0902(4) 0.0116(7) Uani 1 1 d . . . 
O3 O 0.3283(13) 0.9133(8) 0.1930(4) 0.0153(8) Uani 1 1 d . . . 
O4 O -0.0119(13) 0.6761(9) 0.2703(4) 0.0177(9) Uani 1 1 d . . . 
C1 C 0.3740(16) 0.9139(11) 0.3930(5) 0.0152(10) Uani 1 1 d . . . 
C2 C 0.5431(19) 1.1146(12) 0.4046(6) 0.0187(11) Uani 1 1 d . . . 
H2 H 0.5733 1.1922 0.3407 0.022 Uiso 1 1 calc R . . 
C3 C 0.2256(16) 0.8265(11) 0.2798(5) 0.0152(10) Uani 1 1 d . . . 
C4 C 0.3320(19) 0.7991(11) 0.4890(6) 0.0189(11) Uani 1 1 d . . . 
H4 H 0.2202 0.6642 0.4821 0.023 Uiso 1 1 calc R . . 
 
loop_ 
 _atom_site_aniso_label 
 _atom_site_aniso_U_11 
 _atom_site_aniso_U_22 
 _atom_site_aniso_U_33 
 _atom_site_aniso_U_23 
 _atom_site_aniso_U_13 
 _atom_site_aniso_U_12 
Eu 0.00735(8) 0.00774(9) 0.00760(11) 0.00004(6) 0.00082(6) 0.00010(5) 
O1 0.0102(13) 0.0112(15) 0.0069(16) -0.0008(12) 0.0003(11) 0.0001(11) 
O2 0.0122(13) 0.0092(14) 0.0138(19) -0.0004(13) 0.0027(13) 0.0012(11) 
O3 0.0197(17) 0.0183(19) 0.0073(18) 0.0009(15) -0.0008(14) 0.0005(14) 
O4 0.0187(18) 0.026(2) 0.0080(18) -0.0040(17) 0.0025(14) -0.0054(16) 
C1 0.016(2) 0.021(3) 0.008(2) -0.004(2) -0.0008(17) 0.0006(18) 
C2 0.021(2) 0.023(3) 0.011(3) -0.002(2) 0.001(2) -0.002(2) 
C3 0.016(2) 0.021(3) 0.008(2) -0.0009(19) -0.0028(17) 0.0052(18) 
C4 0.026(3) 0.020(3) 0.010(2) -0.006(2) 0.001(2) -0.005(2) 
 
_geom_special_details 
; 
 All esds (except the esd in the dihedral angle between two l.s. planes) 
 are estimated using the full covariance matrix.  The cell esds are taken 
 into account individually in the estimation of esds in distances, angles 
 and torsion angles; correlations between esds in cell parameters are only 
 used when they are defined by crystal symmetry.  An approximate (isotropic) 
 treatment of cell esds is used for estimating esds involving l.s. planes. 
; 
 
loop_ 
 _geom_bond_atom_site_label_1 
 _geom_bond_atom_site_label_2 
 _geom_bond_distance 
 _geom_bond_site_symmetry_2 
 _geom_bond_publ_flag 
Eu O1 2.385(4) 2_575 ? 
Eu O1 2.394(4) . ? 
Eu O2 2.409(4) . ? 
Eu O1 2.410(4) 2_475 ? 
Eu O2 2.412(4) 2_465 ? 
Eu O2 2.511(4) 2_565 ? 
Eu O4 2.528(5) . ? 
Eu O3 2.543(5) . ? 
Eu O3 2.589(5) 1_455 ? 
Eu C3 2.882(6) . ? 
Eu Eu 3.6773(7) 1_655 ? 
Eu Eu 3.6773(7) 1_455 ? 
O1 Eu 2.385(4) 2_575 ? 
O1 Eu 2.410(4) 2_475 ? 
O2 Eu 2.412(4) 2_465 ? 
O2 Eu 2.511(4) 2_565 ? 
O3 C3 1.279(8) . ? 
O3 Eu 2.589(5) 1_655 ? 
O4 C3 1.265(8) . ? 
C1 C2 1.388(10) . ? 
C1 C4 1.390(10) . ? 
C1 C3 1.483(8) . ? 
C2 C4 1.392(9) 2_676 ? 
C2 H2 0.9300 . ? 
C4 C2 1.392(9) 2_676 ? 
C4 H4 0.9300 . ? 
 
loop_ 
 _geom_angle_atom_site_label_1 
 _geom_angle_atom_site_label_2 
 _geom_angle_atom_site_label_3 
 _geom_angle 
 _geom_angle_site_symmetry_1 
 _geom_angle_site_symmetry_3 
 _geom_angle_publ_flag 
O1 Eu O1 70.43(16) 2_575 . ? 
O1 Eu O2 75.96(14) 2_575 . ? 
O1 Eu O2 125.06(15) . . ? 
O1 Eu O1 100.14(16) 2_575 2_475 ? 
O1 Eu O1 69.13(16) . 2_475 ? 
O2 Eu O1 75.77(14) . 2_475 ? 
O1 Eu O2 146.19(14) 2_575 2_465 ? 
O1 Eu O2 131.54(13) . 2_465 ? 
O2 Eu O2 70.24(17) . 2_465 ? 
O1 Eu O2 72.61(15) 2_475 2_465 ? 
O1 Eu O2 71.28(14) 2_575 2_565 ? 
O1 Eu O2 131.35(13) . 2_565 ? 
O2 Eu O2 71.39(17) . 2_565 ? 
O1 Eu O2 147.15(14) 2_475 2_565 ? 
O2 Eu O2 96.65(15) 2_465 2_565 ? 
O1 Eu O4 118.21(15) 2_575 . ? 
O1 Eu O4 107.17(16) . . ? 
O2 Eu O4 126.95(16) . . ? 
O1 Eu O4 138.24(15) 2_475 . ? 
O2 Eu O4 82.89(16) 2_465 . ? 
O2 Eu O4 67.30(16) 2_565 . ? 
O1 Eu O3 71.46(15) 2_575 . ? 
O1 Eu O3 71.55(15) . . ? 
O2 Eu O3 134.50(15) . . ? 
O1 Eu O3 140.26(15) 2_475 . ? 
O2 Eu O3 134.70(16) 2_465 . ? 
O2 Eu O3 68.61(15) 2_565 . ? 
O4 Eu O3 51.81(16) . . ? 
O1 Eu O3 140.60(15) 2_575 1_455 ? 
O1 Eu O3 70.50(15) . 1_455 ? 
O2 Eu O3 133.08(14) . 1_455 ? 
O1 Eu O3 70.27(14) 2_475 1_455 ? 
O2 Eu O3 69.35(15) 2_465 1_455 ? 
O2 Eu O3 136.00(15) 2_565 1_455 ? 
O4 Eu O3 69.62(16) . 1_455 ? 
O3 Eu O3 91.52(15) . 1_455 ? 
O1 Eu C3 96.66(17) 2_575 . ? 
O1 Eu C3 86.71(17) . . ? 
O2 Eu C3 140.09(16) . . ? 
O1 Eu C3 143.54(15) 2_475 . ? 
O2 Eu C3 108.58(18) 2_465 . ? 
O2 Eu C3 69.16(16) 2_565 . ? 
O4 Eu C3 26.01(18) . . ? 
O3 Eu C3 26.32(18) . . ? 
O3 Eu C3 76.20(16) 1_455 . ? 
O1 Eu Eu 40.18(10) 2_575 1_655 ? 
O1 Eu Eu 90.93(10) . 1_655 ? 
O2 Eu Eu 90.21(10) . 1_655 ? 
O1 Eu Eu 140.32(10) 2_475 1_655 ? 
O2 Eu Eu 137.30(10) 2_465 1_655 ? 
O2 Eu Eu 40.65(10) 2_565 1_655 ? 
O4 Eu Eu 79.50(11) . 1_655 ? 
O3 Eu Eu 44.74(11) . 1_655 ? 
O3 Eu Eu 136.26(11) 1_455 1_655 ? 
C3 Eu Eu 63.14(13) . 1_655 ? 
O1 Eu Eu 139.82(10) 2_575 1_455 ? 
O1 Eu Eu 89.07(10) . 1_455 ? 
O2 Eu Eu 89.79(10) . 1_455 ? 
O1 Eu Eu 39.68(10) 2_475 1_455 ? 
O2 Eu Eu 42.70(10) 2_465 1_455 ? 
O2 Eu Eu 139.35(10) 2_565 1_455 ? 
O4 Eu Eu 100.50(11) . 1_455 ? 
O3 Eu Eu 135.26(11) . 1_455 ? 
O3 Eu Eu 43.74(11) 1_455 1_455 ? 
C3 Eu Eu 116.86(13) . 1_455 ? 
Eu Eu Eu 180.000(18) 1_655 1_455 ? 
Eu O1 Eu 109.57(16) 2_575 . ? 
Eu O1 Eu 100.14(16) 2_575 2_475 ? 
Eu O1 Eu 110.87(16) . 2_475 ? 
Eu O2 Eu 109.76(17) . 2_465 ? 
Eu O2 Eu 108.61(17) . 2_565 ? 
Eu O2 Eu 96.65(15) 2_465 2_565 ? 
C3 O3 Eu 91.8(4) . . ? 
C3 O3 Eu 126.2(4) . 1_655 ? 
Eu O3 Eu 91.52(15) . 1_655 ? 
C3 O4 Eu 92.8(4) . . ? 
C2 C1 C4 119.2(6) . . ? 
C2 C1 C3 120.5(6) . . ? 
C4 C1 C3 120.2(6) . . ? 
C1 C2 C4 120.6(7) . 2_676 ? 
C1 C2 H2 119.7 . . ? 
C4 C2 H2 119.7 2_676 . ? 
O4 C3 O3 121.1(6) . . ? 
O4 C3 C1 120.1(6) . . ? 
O3 C3 C1 118.6(6) . . ? 
O4 C3 Eu 61.2(3) . . ? 
O3 C3 Eu 61.9(3) . . ? 
C1 C3 Eu 162.8(4) . . ? 
C1 C4 C2 120.2(6) . 2_676 ? 
C1 C4 H4 119.9 . . ? 
C2 C4 H4 119.9 2_676 . ? 
 
_diffrn_measured_fraction_theta_max    0.870 
_diffrn_reflns_theta_full              44.99 
_diffrn_measured_fraction_theta_full   0.870 
_refine_diff_density_max    5.530 
_refine_diff_density_min   -6.762 
_refine_diff_density_rms    0.702 

#===END

data_MIL-52
  
_audit_creation_method            SHELXL-97 
_chemical_name_systematic 
; 
 ? 
; 
_chemical_name_common             ? 
_chemical_melting_point           ? 
_chemical_formula_moiety          ? 
_chemical_formula_sum 
 'C16 H8 Eu2 O8' 
_chemical_formula_weight          632.14 
  
loop_ 
 _atom_type_symbol 
 _atom_type_description 
 _atom_type_scat_dispersion_real 
 _atom_type_scat_dispersion_imag 
 _atom_type_scat_source 
 'C'  'C'   0.0033   0.0016 
 'International Tables Vol C Tables 4.2.6.8 and 6.1.1.4' 
 'H'  'H'   0.0000   0.0000 
 'International Tables Vol C Tables 4.2.6.8 and 6.1.1.4' 
 'O'  'O'   0.0106   0.0060 
 'International Tables Vol C Tables 4.2.6.8 and 6.1.1.4' 
 'Eu'  'Eu'  -0.1578   3.6682 
 'International Tables Vol C Tables 4.2.6.8 and 6.1.1.4' 
  
_symmetry_cell_setting            Orthorhombic 
_symmetry_space_group_name_H-M    Pbca 
  
loop_ 
 _symmetry_equiv_pos_as_xyz 
 'x, y, z' 
 '-x+1/2, -y, z+1/2' 
 '-x, y+1/2, -z+1/2' 
 'x+1/2, -y+1/2, -z' 
 '-x, -y, -z' 
 'x-1/2, y, -z-1/2' 
 'x, -y-1/2, z-1/2' 
 '-x-1/2, y-1/2, z' 
  
_cell_length_a                    7.4052(2) 
_cell_length_b                    10.1144(3) 
_cell_length_c                    18.7512(5) 
_cell_angle_alpha                 90.00 
_cell_angle_beta                  90.00 
_cell_angle_gamma                 90.00 
_cell_volume                      1404.45(7) 
_cell_formula_units_Z             4 
_cell_measurement_temperature     293(2) 
_cell_measurement_reflns_used     6188 
_cell_measurement_theta_min       ? 
_cell_measurement_theta_max       ? 
  
_exptl_crystal_description        platelet 
_exptl_crystal_colour             colorless 
_exptl_crystal_size_max           0.24 
_exptl_crystal_size_mid           0.16 
_exptl_crystal_size_min           0.04 
_exptl_crystal_density_meas       ? 
_exptl_crystal_density_diffrn     2.990 
_exptl_crystal_density_method     'not measured' 
_exptl_crystal_F_000              1176 
_exptl_absorpt_coefficient_mu     8.900 
_exptl_absorpt_correction_type    semi_empirical 
_exptl_absorpt_correction_T_min   0.2239 
_exptl_absorpt_correction_T_max   0.7172 
_exptl_absorpt_process_details    SADABS   
  
_exptl_special_details 
; 
'Blessing (1995). Acta Cryst.  A51, 33-38'  
; 
  
_diffrn_ambient_temperature       293(2) 
_diffrn_radiation_wavelength      0.71073 
_diffrn_radiation_type            MoK\a 
_diffrn_radiation_source          'fine-focus sealed tube' 
_diffrn_radiation_monochromator   graphite 
_diffrn_measurement_device_type   'CCD area detector' 
_diffrn_measurement_method        'phi and omega scans' 
_diffrn_detector_area_resol_mean  ? 
_diffrn_standards_number          0 
_diffrn_standards_interval_count  0 
_diffrn_standards_interval_time   0 
_diffrn_standards_decay_%         0 
_diffrn_reflns_number             9027 
_diffrn_reflns_av_R_equivalents   0.0529 
_diffrn_reflns_av_sigmaI/netI     0.0414 
_diffrn_reflns_limit_h_min        -9 
_diffrn_reflns_limit_h_max        9 
_diffrn_reflns_limit_k_min        -13 
_diffrn_reflns_limit_k_max        8 
_diffrn_reflns_limit_l_min        -25 
_diffrn_reflns_limit_l_max        25 
_diffrn_reflns_theta_min          2.17 
_diffrn_reflns_theta_max          29.60 
_reflns_number_total              1872 
_reflns_number_gt                 1466 
_reflns_threshold_expression      >2sigma(I) 
  
_computing_data_collection        'Bruker SMART' 
_computing_cell_refinement        'Bruker SMART' 
_computing_data_reduction         'Bruker SHELXTL' 
_computing_structure_solution     'SHELXS-97 (Sheldrick, 1990)' 
_computing_structure_refinement   'SHELXL-97 (Sheldrick, 1997)' 
_computing_molecular_graphics     'Diamond Brandenburg' 
_computing_publication_material   'Bruker SHELXTL' 
  
_refine_special_details 
; 
 Refinement of F^2^ against ALL reflections.  The weighted R-factor wR and 
 goodness of fit S are based on F^2^, conventional R-factors R are based 
 on F, with F set to zero for negative F^2^. The threshold expression of 
 F^2^ > 2sigma(F^2^) is used only for calculating R-factors(gt) etc. and is 
 not relevant to the choice of reflections for refinement.  R-factors based 
 on F^2^ are statistically about twice as large as those based on F, and R- 
 factors based on ALL data will be even larger. 
; 
  
_refine_ls_structure_factor_coef  Fsqd 
_refine_ls_matrix_type            full 
_refine_ls_weighting_scheme       calc 
_refine_ls_weighting_details 
 'calc w=1/[\s^2^(Fo^2^)+(0.0299P)^2^+0.0000P] where P=(Fo^2^+2Fc^2^)/3' 
_atom_sites_solution_primary      direct 
_atom_sites_solution_secondary    difmap 
_atom_sites_solution_hydrogens    geom 
_refine_ls_hydrogen_treatment     mixed 
_refine_ls_extinction_method      SHELXL 
_refine_ls_extinction_coef        0.00096(11) 
_refine_ls_extinction_expression 
 'Fc^*^=kFc[1+0.001xFc^2^\l^3^/sin(2\q)]^-1/4^' 
_refine_ls_number_reflns          1872 
_refine_ls_number_parameters      119 
_refine_ls_number_restraints      0 
_refine_ls_R_factor_all           0.0385 
_refine_ls_R_factor_gt            0.0263 
_refine_ls_wR_factor_ref          0.0608 
_refine_ls_wR_factor_gt           0.0572 
_refine_ls_goodness_of_fit_ref    0.976 
_refine_ls_restrained_S_all       0.976 
_refine_ls_shift/su_max           0.001 
_refine_ls_shift/su_mean          0.000 
  
loop_ 
 _atom_site_label 
 _atom_site_type_symbol 
 _atom_site_fract_x 
 _atom_site_fract_y 
 _atom_site_fract_z 
 _atom_site_U_iso_or_equiv 
 _atom_site_adp_type 
 _atom_site_occupancy 
 _atom_site_symmetry_multiplicity 
 _atom_site_calc_flag 
 _atom_site_refinement_flags 
 _atom_site_disorder_assembly 
 _atom_site_disorder_group 
Eu1 Eu 0.03103(3) 0.699201(18) 0.019037(11) 0.01543(9) Uani 1 1 d . . . 
O1 O 0.3279(4) 0.5984(2) -0.03273(14) 0.0183(6) Uani 1 1 d . . . 
O2 O 0.0504(4) 0.4780(3) 0.08037(15) 0.0196(6) Uani 1 1 d . . . 
O3 O -0.2050(4) 0.7077(3) -0.09678(16) 0.0223(6) Uani 1 1 d . . . 
O4 O -0.3118(3) 0.6185(2) 0.05755(15) 0.0179(6) Uani 1 1 d . . . 
CA C -0.1320(5) 0.6026(4) -0.1209(2) 0.0177(8) Uani 1 1 d . . . 
CB C 0.3350(5) 0.5011(4) -0.0753(2) 0.0161(8) Uani 1 1 d . . . 
C1 C 0.4460(5) 0.4629(4) -0.2719(2) 0.0177(8) Uani 1 1 d . . . 
H1 H 0.5024 0.4027 -0.3021 0.021 Uiso 1 1 calc R . . 
C2 C 0.4405(5) 0.4389(4) -0.1992(2) 0.0192(9) Uani 1 1 d . . . 
H2 H 0.4886 0.3608 -0.1811 0.023 Uiso 1 1 calc R . . 
C3 C 0.3636(5) 0.5307(3) -0.1530(2) 0.0163(8) Uani 1 1 d . . . 
C4 C 0.2981(5) 0.6496(4) -0.1813(2) 0.0181(9) Uani 1 1 d . . . 
H4 H 0.2554 0.7150 -0.1508 0.022 Uiso 1 1 calc R . . 
C5 C 0.2038(5) 0.3295(4) 0.2464(2) 0.0183(9) Uani 1 1 d . . . 
H5 H 0.2531 0.2518 0.2284 0.022 Uiso 1 1 calc R . . 
C6 C 0.3673(5) 0.5770(4) -0.3003(2) 0.0171(8) Uani 1 1 d . . . 
  
loop_ 
 _atom_site_aniso_label 
 _atom_site_aniso_U_11 
 _atom_site_aniso_U_22 
 _atom_site_aniso_U_33 
 _atom_site_aniso_U_23 
 _atom_site_aniso_U_13 
 _atom_site_aniso_U_12 
Eu1 0.01586(13) 0.01375(12) 0.01669(13) -0.00002(8) -0.00017(8) 0.00030(7) 
O1 0.0201(15) 0.0170(13) 0.0179(15) -0.0038(12) -0.0022(11) -0.0015(12) 
O2 0.0263(15) 0.0172(14) 0.0153(14) 0.0016(11) -0.0025(11) 0.0021(11) 
O3 0.0289(16) 0.0209(14) 0.0172(15) -0.0028(12) 0.0041(13) 0.0059(11) 
O4 0.0249(15) 0.0134(13) 0.0156(15) 0.0022(11) 0.0025(12) -0.0009(10) 
CA 0.017(2) 0.0183(18) 0.017(2) 0.0002(16) 0.0001(15) -0.0027(16) 
CB 0.0115(17) 0.0159(18) 0.021(2) 0.0013(17) -0.0009(15) 0.0021(15) 
C1 0.021(2) 0.0126(19) 0.020(2) -0.0007(15) 0.0025(16) 0.0010(14) 
C2 0.024(2) 0.0127(18) 0.021(2) 0.0022(16) 0.0010(17) 0.0017(14) 
C3 0.0160(19) 0.0159(18) 0.017(2) 0.0020(15) 0.0009(15) -0.0037(15) 
C4 0.022(2) 0.0133(18) 0.019(2) -0.0019(16) 0.0024(16) 0.0013(15) 
C5 0.021(2) 0.0147(19) 0.019(2) -0.0027(16) -0.0006(16) 0.0019(14) 
C6 0.0160(19) 0.0172(19) 0.018(2) 0.0002(16) 0.0022(15) -0.0023(15) 
  
_geom_special_details 
; 
 All esds (except the esd in the dihedral angle between two l.s. planes) 
 are estimated using the full covariance matrix.  The cell esds are taken 
 into account individually in the estimation of esds in distances, angles 
 and torsion angles; correlations between esds in cell parameters are only 
 used when they are defined by crystal symmetry.  An approximate (isotropic) 
 treatment of cell esds is used for estimating esds involving l.s. planes. 
; 
  
loop_ 
 _geom_bond_atom_site_label_1 
 _geom_bond_atom_site_label_2 
 _geom_bond_distance 
 _geom_bond_site_symmetry_2 
 _geom_bond_publ_flag 
Eu1 O2 2.520(3) . ? 
Eu1 O1 2.554(3) 4_465 ? 
Eu1 O1 2.611(3) . ? 
Eu1 O4 2.611(3) 4_565 ? 
Eu1 O3 2.614(3) 4_565 ? 
Eu1 O2 2.655(3) 5_565 ? 
Eu1 O4 2.763(3) . ? 
Eu1 O3 2.789(3) . ? 
Eu1 CA 3.050(4) . ? 
Eu1 Eu1 3.90831(15) 4_465 ? 
Eu1 Eu1 3.90831(15) 4_565 ? 
Eu1 Eu1 4.1181(4) 5_565 ? 
O1 CB 1.269(4) . ? 
O1 Eu1 2.554(3) 4_565 ? 
O2 CA 1.268(5) 5_565 ? 
O2 Eu1 2.655(3) 5_565 ? 
O3 CA 1.276(4) . ? 
O3 Eu1 2.614(3) 4_465 ? 
O4 CB 1.266(4) 5_565 ? 
O4 Eu1 2.611(3) 4_465 ? 
CA O2 1.268(5) 5_565 ? 
CA C6 1.499(5) 6 ? 
CB O4 1.266(4) 5_565 ? 
CB C3 1.501(5) . ? 
C1 C2 1.385(6) . ? 
C1 C6 1.398(5) . ? 
C1 H1 0.9300 . ? 
C2 C3 1.393(5) . ? 
C2 H2 0.9300 . ? 
C3 C4 1.401(5) . ? 
C4 C5 1.372(5) 2_564 ? 
C4 H4 0.9300 . ? 
C5 C4 1.372(5) 2_565 ? 
C5 C6 1.393(6) 2_565 ? 
C5 H5 0.9300 . ? 
C6 C5 1.393(6) 2_564 ? 
C6 CA 1.499(5) 6_655 ? 
  
loop_ 
 _geom_angle_atom_site_label_1 
 _geom_angle_atom_site_label_2 
 _geom_angle_atom_site_label_3 
 _geom_angle 
 _geom_angle_site_symmetry_1 
 _geom_angle_site_symmetry_3 
 _geom_angle_publ_flag 
O2 Eu1 O1 134.40(8) . 4_465 ? 
O2 Eu1 O1 76.99(8) . . ? 
O1 Eu1 O1 147.85(6) 4_465 . ? 
O2 Eu1 O4 148.51(8) . 4_565 ? 
O1 Eu1 O4 75.62(8) 4_465 4_565 ? 
O1 Eu1 O4 72.30(8) . 4_565 ? 
O2 Eu1 O3 91.31(8) . 4_565 ? 
O1 Eu1 O3 95.48(9) 4_465 4_565 ? 
O1 Eu1 O3 73.64(9) . 4_565 ? 
O4 Eu1 O3 73.67(9) 4_565 4_565 ? 
O2 Eu1 O2 74.58(10) . 5_565 ? 
O1 Eu1 O2 118.55(8) 4_465 5_565 ? 
O1 Eu1 O2 70.52(8) . 5_565 ? 
O4 Eu1 O2 101.06(8) 4_565 5_565 ? 
O3 Eu1 O2 143.57(9) 4_565 5_565 ? 
O2 Eu1 O4 70.77(8) . . ? 
O1 Eu1 O4 70.70(8) 4_465 . ? 
O1 Eu1 O4 139.07(8) . . ? 
O4 Eu1 O4 139.66(8) 4_565 . ? 
O3 Eu1 O4 130.38(9) 4_565 . ? 
O2 Eu1 O4 77.01(8) 5_565 . ? 
O2 Eu1 O3 114.73(8) . . ? 
O1 Eu1 O3 71.61(8) 4_465 . ? 
O1 Eu1 O3 104.49(8) . . ? 
O4 Eu1 O3 80.18(8) 4_565 . ? 
O3 Eu1 O3 153.10(4) 4_565 . ? 
O2 Eu1 O3 48.07(8) 5_565 . ? 
O4 Eu1 O3 68.70(8) . . ? 
O2 Eu1 CA 97.52(10) . . ? 
O1 Eu1 CA 96.33(10) 4_465 . ? 
O1 Eu1 CA 83.58(9) . . ? 
O4 Eu1 CA 85.96(9) 4_565 . ? 
O3 Eu1 CA 153.05(10) 4_565 . ? 
O2 Eu1 CA 24.44(9) 5_565 . ? 
O4 Eu1 CA 76.49(9) . . ? 
O3 Eu1 CA 24.72(9) . . ? 
O2 Eu1 Eu1 111.77(6) . 4_465 ? 
O1 Eu1 Eu1 41.36(6) 4_465 4_465 ? 
O1 Eu1 Eu1 146.36(6) . 4_465 ? 
O4 Eu1 Eu1 97.83(6) 4_565 4_465 ? 
O3 Eu1 Eu1 135.69(6) 4_565 4_465 ? 
O2 Eu1 Eu1 80.44(6) 5_565 4_465 ? 
O4 Eu1 Eu1 41.84(5) . 4_465 ? 
O3 Eu1 Eu1 41.92(6) . 4_465 ? 
CA Eu1 Eu1 63.38(7) . 4_465 ? 
O2 Eu1 Eu1 105.24(6) . 4_565 ? 
O1 Eu1 Eu1 111.45(6) 4_465 4_565 ? 
O1 Eu1 Eu1 40.27(6) . 4_565 ? 
O4 Eu1 Eu1 44.89(6) 4_565 4_565 ? 
O3 Eu1 Eu1 45.47(7) 4_565 4_565 ? 
O2 Eu1 Eu1 105.33(6) 5_565 4_565 ? 
O4 Eu1 Eu1 174.85(6) . 4_565 ? 
O3 Eu1 Eu1 116.32(6) . 4_565 ? 
CA Eu1 Eu1 107.59(7) . 4_565 ? 
Eu1 Eu1 Eu1 142.656(11) 4_465 4_565 ? 
O2 Eu1 Eu1 38.43(6) . 5_565 ? 
O1 Eu1 Eu1 137.41(6) 4_465 5_565 ? 
O1 Eu1 Eu1 69.34(6) . 5_565 ? 
O4 Eu1 Eu1 130.20(6) 4_565 5_565 ? 
O3 Eu1 Eu1 122.19(6) 4_565 5_565 ? 
O2 Eu1 Eu1 36.15(6) 5_565 5_565 ? 
O4 Eu1 Eu1 69.73(5) . 5_565 ? 
O3 Eu1 Eu1 79.93(5) . 5_565 ? 
CA Eu1 Eu1 59.54(7) . 5_565 ? 
Eu1 Eu1 Eu1 96.885(7) 4_465 5_565 ? 
Eu1 Eu1 Eu1 109.350(8) 4_565 5_565 ? 
CB O1 Eu1 131.4(2) . 4_565 ? 
CB O1 Eu1 124.9(2) . . ? 
Eu1 O1 Eu1 98.36(9) 4_565 . ? 
CA O2 Eu1 150.6(2) 5_565 . ? 
CA O2 Eu1 95.5(2) 5_565 5_565 ? 
Eu1 O2 Eu1 105.42(10) . 5_565 ? 
CA O3 Eu1 144.6(3) . 4_465 ? 
CA O3 Eu1 89.2(2) . . ? 
Eu1 O3 Eu1 92.61(9) 4_465 . ? 
CB O4 Eu1 139.4(2) 5_565 4_465 ? 
CB O4 Eu1 118.4(2) 5_565 . ? 
Eu1 O4 Eu1 93.28(8) 4_465 . ? 
O2 CA O3 121.6(4) 5_565 . ? 
O2 CA C6 118.8(3) 5_565 6 ? 
O3 CA C6 119.5(3) . 6 ? 
O2 CA Eu1 60.1(2) 5_565 . ? 
O3 CA Eu1 66.1(2) . . ? 
C6 CA Eu1 154.7(2) 6 . ? 
O4 CB O1 124.7(4) 5_565 . ? 
O4 CB C3 117.8(3) 5_565 . ? 
O1 CB C3 117.5(3) . . ? 
C2 C1 C6 120.5(4) . . ? 
C2 C1 H1 119.7 . . ? 
C6 C1 H1 119.7 . . ? 
C1 C2 C3 120.5(4) . . ? 
C1 C2 H2 119.8 . . ? 
C3 C2 H2 119.8 . . ? 
C2 C3 C4 118.6(4) . . ? 
C2 C3 CB 121.9(3) . . ? 
C4 C3 CB 119.4(3) . . ? 
C5 C4 C3 120.7(4) 2_564 . ? 
C5 C4 H4 119.6 2_564 . ? 
C3 C4 H4 119.6 . . ? 
C4 C5 C6 120.9(4) 2_565 2_565 ? 
C4 C5 H5 119.6 2_565 . ? 
C6 C5 H5 119.6 2_565 . ? 
C5 C6 C1 118.6(4) 2_564 . ? 
C5 C6 CA 120.3(3) 2_564 6_655 ? 
C1 C6 CA 121.1(3) . 6_655 ? 
  
_diffrn_measured_fraction_theta_max    0.946 
_diffrn_reflns_theta_full              29.60 
_diffrn_measured_fraction_theta_full   0.946 
_refine_diff_density_max    2.073 
_refine_diff_density_min   -1.306 
_refine_diff_density_rms    0.196 

#===END  
